# Supplementary material for: Loss of tricellular tight junction protein LSR promotes cell invasion and migration via upregulation of TEAD1/AREG in human endometrial cancer
Source: PubMed Central journal article supplement (PMC5223122; doi:10.1038/srep37049), 2017-01-10
Supplement: srep37049-s1.pdf [file srep37049-s1.pdf]

# **Loss of tricellular tight junction protein LSR promotes cell invasion and migration via upregulation of TEAD1/AREG in human endometrial cancer**

Hiroshi Shimada<sup>1,3</sup>, Shyuetsu Abe<sup>1,3#</sup>, Takayuki Kohno<sup>3</sup>,  
Seiro Satohisa<sup>1</sup>, Takumi Konno<sup>3</sup>, Syunta Takahashi<sup>3</sup>,  
Tsubasa Hatakeyama<sup>3</sup>, Chihiro Arimoto<sup>3</sup>, Takuya Kakuki<sup>2,3</sup>,  
Yakuto Kaneko<sup>2,3</sup>, Ken-ichi Takano<sup>2</sup>, Tsuyoshi Saito<sup>1</sup>  
and Takashi Kojima<sup>3\*</sup>

Departments of <sup>1</sup>Obstetrics and Gynecology, and <sup>2</sup>Otolaryngology,  
Sapporo Medical University School of Medicine, Sapporo, Japan  
Department of <sup>3</sup>Cell Science, Research Institute for Frontier Medicine,  
Sapporo Medical University School of Medicine, Sapporo, Japan

#: equal first authors

\*Author for correspondence: Takashi Kojima, Ph.D.

Department of Cell Science, Research Institute for Frontier Medicine,  
Sapporo Medical University School of Medicine, South-1, West-17,  
Chuo-ku, Sapporo 060-8556, Japan

Tel: +81-11-688-9612

Fax: +81-11-611-2299

E-mail address: ktakashi@sapmed.ac.jp

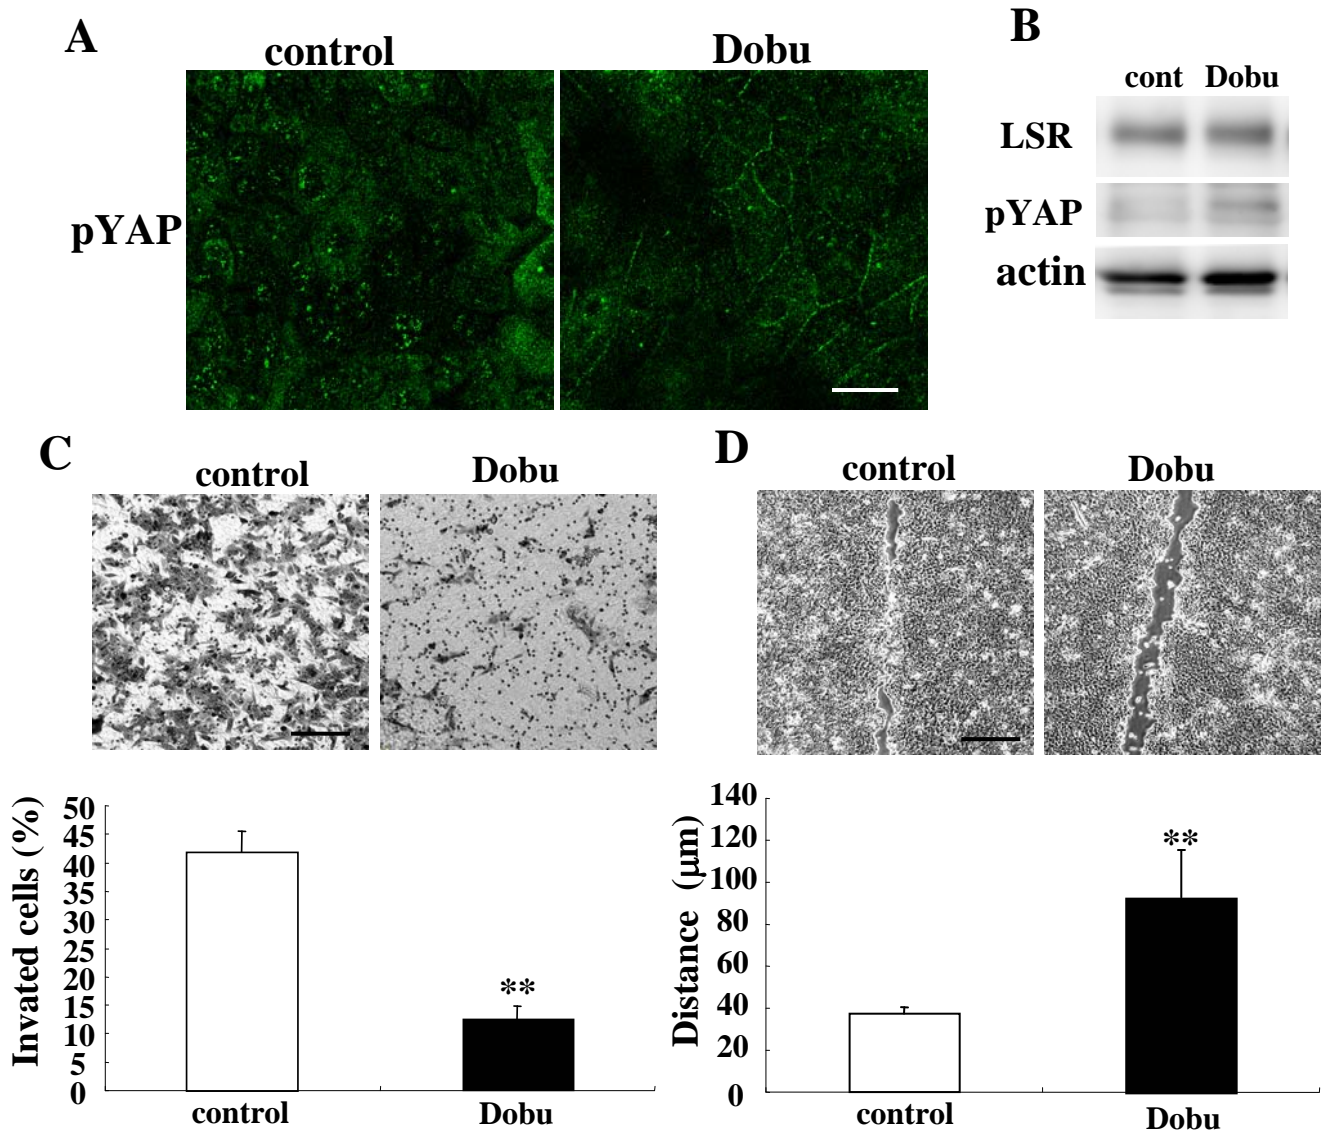

**Supplemental Fig.1 Treatment with dobutamine inhibits Sawano cell invasion and migration**

**A.** Immunocytochemical staining for pYAP in Sawano cells treated with 10  $\mu$ M dobutamine. Scale bars: 20  $\mu$ m. **B.** Western blotting for LSR and pYAP in Sawano cells treated with 10  $\mu$ M dobutamine (Dobu). **C.** Matrigel invasion assay of Sawano cells treated with 10  $\mu$ M dobutamine (Dobu). Scale bars: 100  $\mu$ m. The results are shown as a bar graph. Control vs. dobutamine: \*\* $p < 0.01$ . **D.** Migration assay of Sawano cells treated with 10  $\mu$ M dobutamine (Dobu). Scale bars: 400  $\mu$ m. The results are shown as a bar graph. Control vs. dobutamine: \*\* $p < 0.01$ .
